# Supplementary material for: Information Technology, Revenues, and Profits: Exploring the Role of Foreign and Domestic Operations
Source: Atypon-hosted journal article supplement (doi:10.1287/isre.2017.0689), 2017-04-24
Supplement: isre.2017.0689-sm.pdf [file isre.2017.0689-sm.pdf]

## ONLINE SUPPLEMENT

### Table A1. Related Studies

| Study                                   | Dataset and models                                                                                         | IT measure                      | Globalization or other measure                                                                                            | Main findings                                                                                                                                                                                                                                            |
|-----------------------------------------|------------------------------------------------------------------------------------------------------------|---------------------------------|---------------------------------------------------------------------------------------------------------------------------|----------------------------------------------------------------------------------------------------------------------------------------------------------------------------------------------------------------------------------------------------------|
| Nachum and Zaheer (2005)                | Industry level BEA data on inward and outward FDI for 30 industries from 1990 – 1998 (n=270), OLS          | ICT intensity at industry level | Motivation for globalization – market seeking, resource seeking, export seeking, efficiency seeking, or knowledge seeking | Knowledge seeking and efficiency seeking are dominant motives for international activity in more information-intensive industries, while market seeking and low-cost platforms for exports are dominant motives in less information-intensive industries |
| Rangan and Sengul (2009)                | Industry level BEA data on 2-digit SIC level for 15 manufacturing industries from 1982 – 1997 (n=240), OLS | ICT intensity at industry level | Transnational integration measured by ratio of intra-firm flows to total exports and sales of parent and affiliates       | Higher IT intensity at industry level is associated with less parent-to-affiliate international activity. This effect is positively moderated by knowledge intensity and industry internationalization                                                   |
| Chari, Devaraj and David (2007)         | Firm level data for 1997 (n=131), OLS                                                                      | IT intensity at firm level      | Not applicable (dependent variable in this study is Tobin's q)                                                            | Performance impact of international diversification is higher when firms invest more in IT                                                                                                                                                               |
| Ravichandran, Liu, Han and Hasan (2009) | Firm level data from manufacturing industries from 1991 – 1996 (n=403), OLS                                | IT intensity at firm level      | Not applicable (dependent variables in this study are ROA and Tobin's q)                                                  | IT influences performance only when geographic diversification is low                                                                                                                                                                                    |
| This Study                              | Firm level data from multiple sources from 1999 – 2006 (n=822), panel models                               | IT intensity at firm-level      | Foreign revenues and foreign profits at firm level, controlling for firm size and other measures                          | IT expenditures at firm level are positively associated with foreign revenues and foreign profits, and the effect of IT on foreign profits is more through revenue enhancement than cost reduction                                                       |

Note: Table A1 lists some representative studies and is not meant to be exhaustive (for more detailed review of the business value of IT literature, see Dedrick, Gurbaxani and Kraemer 2003; Sabherwal and Jeyaraj 2015; Schryen 2013). Among globalization-related studies in the information systems (IS) literature, researchers have focused primarily on how IT supports global strategy (Ives and Jarvenpaa 1991; Ives, Jarvenpaa and Mason 1993; Jarvenpaa and Ives 1993; Kettinger, Marchand and Davis 2010), how firms manage global IT departments (King and Sethi 1999; Rao, Brown and Perkins 2007; Sia, Soh and Weill 2010), employment structures, performance and compensation of IT and BPO professionals in non-U.S. labor markets (e.g., Ang, Slaughter and Ng 2002; Bapna et al. 2013; Ho, Whitaker, Mithas and Roy 2013; Kim, Mithas, Whitaker and Roy 2014; Levina and Xin 2007; Whitaker, Mithas and Liu 2016), internationalization strategies of IT suppliers (Su 2013), globalization of IT labor and mobility of IT professionals across country borders (Mithas and Lucas 2010), diffusion of global electronic commerce (Kraemer, Dedrick, Melville and Zhu 2006; Zhu, Kraemer and Xu 2006), and globalization of occupations and other business processes (Carmel and Agarwal 2002; Espinosa, Slaughter, Kraut and Herbsleb 2007; Lacity, Feeny and Willcocks 2003; Mithas and Whitaker 2007; Rottman and Lacity 2004; Whitaker, Mithas and Krishnan 2011).

**Table A2. Year-wise Descriptive Statistics for Key Variables  
(Nominal U.S. dollar amounts)**

| <b>Year</b>  |           | <b>Foreign revenues</b> | <b>Foreign profits</b> | <b>Foreign costs</b> | <b>Domestic revenues</b> | <b>Domestic profits</b> | <b>IT expenditures</b> |
|--------------|-----------|-------------------------|------------------------|----------------------|--------------------------|-------------------------|------------------------|
| <b>1999</b>  | Mean      | 5,927.38                | 395.14                 | 5,532                | 9,055.57                 | 1,836.04                | 309.94                 |
|              | Std. Dev. | 11,464.62               | 775.33                 | 10,896               | 19,449.26                | 4,498.38                | 525.89                 |
|              | Obs.      | 82                      | 82                     | 82                   | 82                       | 82                      | 82                     |
| <b>2000</b>  | Mean      | 5,873.21                | 573.08                 | 5,300                | 9,670.02                 | 1,933.04                | 547.30                 |
|              | Std. Dev. | 10,733.93               | 1,117.64               | 9,757                | 18,261.86                | 4,066.50                | 1,208.55               |
|              | Obs.      | 106                     | 106                    | 106                  | 106                      | 106                     | 106                    |
| <b>2001</b>  | Mean      | 4,649.73                | 356.04                 | 4,294                | 7,977.60                 | 1,507.87                | 392.15                 |
|              | Std. Dev. | 7,904.17                | 993.03                 | 7,189                | 16,361.67                | 3,812.17                | 663.75                 |
|              | Obs.      | 100                     | 100                    | 100                  | 100                      | 100                     | 100                    |
| <b>2002</b>  | Mean      | 4,007.28                | 324.41                 | 3,683                | 7,020.17                 | 1,386.37                | 337.83                 |
|              | Std. Dev. | 7,254.93                | 771.90                 | 6,701                | 15,532.92                | 3,165.87                | 702.69                 |
|              | Obs.      | 123                     | 123                    | 123                  | 123                      | 123                     | 123                    |
| <b>2003</b>  | Mean      | 5,328.69                | 361.53                 | 4,967                | 7,618.99                 | 1,418.71                | 361.86                 |
|              | Std. Dev. | 9,841.49                | 646.45                 | 9,453                | 16,172.32                | 3,079.70                | 681.48                 |
|              | Obs.      | 126                     | 126                    | 126                  | 126                      | 126                     | 126                    |
| <b>2004</b>  | Mean      | 5,131.24                | 508.86                 | 4,622                | 7,044.43                 | 1,658.03                | 393.06                 |
|              | Std. Dev. | 10,387.09               | 975.40                 | 9,764                | 15,228.41                | 4,673.96                | 989.96                 |
|              | Obs.      | 103                     | 103                    | 103                  | 103                      | 103                     | 103                    |
| <b>2005</b>  | Mean      | 6,380.19                | 785.16                 | 5,595                | 8,618.70                 | 1,940.27                | 342.55                 |
|              | Std. Dev. | 12,924.22               | 1,560.00               | 12,027               | 17,462.72                | 3,926.68                | 577.69                 |
|              | Obs.      | 94                      | 94                     | 94                   | 94                       | 94                      | 94                     |
| <b>2006</b>  | Mean      | 8,288.11                | 1,136.50               | 7,152                | 10,780.55                | 2,583.66                | 542.28                 |
|              | Std. Dev. | 15,783.52               | 2,565.94               | 14,031               | 19,622.45                | 5,756.54                | 1,084.97               |
|              | Obs.      | 88                      | 88                     | 88                   | 88                       | 88                      | 88                     |
| <b>Total</b> | Mean      | 5,590.63                | 535.81                 | 5,055                | 8361.6                   | 535.81                  | 401.70                 |
|              | Std. Dev. | 10,859.20               | 1,282.59               | 10,020               | 17134.11                 | 1282.59                 | 838.19                 |
|              | Obs.      | 822                     | 822                    | 822                  | 822                      | 822                     | 822                    |

**Table A3. Pairwise Correlations**

Correlations greater than 0.09 are significant at  $p < 0.05$

|    |                            | 1     | 2     | 3     | 4     | 5     | 6     | 7     | 8     | 9     | 10   | 11   | 12    | 13   | 14   | 15   | 16   |
|----|----------------------------|-------|-------|-------|-------|-------|-------|-------|-------|-------|------|------|-------|------|------|------|------|
| 1  | Foreign revenues           | 1.00  |       |       |       |       |       |       |       |       |      |      |       |      |      |      |      |
| 2  | Domestic revenues          | 0.72  | 1.00  |       |       |       |       |       |       |       |      |      |       |      |      |      |      |
| 3  | Foreign profits            | 0.69  | 0.46  | 1.00  |       |       |       |       |       |       |      |      |       |      |      |      |      |
| 4  | Domestic profits           | 0.67  | 0.82  | 0.62  | 1.00  |       |       |       |       |       |      |      |       |      |      |      |      |
| 5  | Non-IT expenditures        | 0.62  | 0.47  | 0.45  | 0.34  | 1.00  |       |       |       |       |      |      |       |      |      |      |      |
| 6  | IT expenditures            | 0.64  | 0.63  | 0.56  | 0.70  | 0.27  | 1.00  |       |       |       |      |      |       |      |      |      |      |
| 7  | Foreign subsidiaries (log) | 0.25  | 0.12  | 0.15  | 0.03  | 0.19  | 0.09  | 1.00  |       |       |      |      |       |      |      |      |      |
| 8  | Acquisitions               | 0.20  | 0.25  | 0.24  | 0.25  | 0.17  | 0.22  | 0.07  | 1.00  |       |      |      |       |      |      |      |      |
| 9  | Intersegment revenue       | 0.13  | -0.04 | 0.05  | -0.10 | 0.09  | 0.06  | 0.01  | -0.01 | 1.00  |      |      |       |      |      |      |      |
| 10 | Foreign assets (log)       | 0.52  | 0.45  | 0.47  | 0.52  | 0.27  | 0.46  | 0.21  | 0.19  | 0.05  | 1.00 |      |       |      |      |      |      |
| 11 | Total assets (log)         | 0.67  | 0.65  | 0.60  | 0.67  | 0.39  | 0.62  | 0.23  | 0.20  | 0.05  | 0.74 | 1.00 |       |      |      |      |      |
| 12 | Capital intensity          | -0.15 | -0.07 | -0.09 | -0.03 | -0.11 | -0.12 | -0.22 | -0.02 | 0.00  | 0.28 | 0.01 | 1.00  |      |      |      |      |
| 13 | Market share               | 0.24  | 0.34  | 0.18  | 0.29  | 0.05  | 0.24  | 0.01  | 0.02  | -0.06 | 0.28 | 0.34 | 0.12  | 1.00 |      |      |      |
| 14 | R&D                        | 0.71  | 0.62  | 0.57  | 0.57  | 0.55  | 0.53  | 0.18  | 0.39  | 0.18  | 0.44 | 0.59 | -0.13 | 0.07 | 1.00 |      |      |
| 15 | Advertising                | 0.62  | 0.72  | 0.34  | 0.61  | 0.53  | 0.44  | 0.14  | 0.29  | 0.06  | 0.37 | 0.46 | -0.03 | 0.10 | 0.66 | 1.00 |      |
| 16 | Employees (log)            | 0.54  | 0.52  | 0.40  | 0.49  | 0.37  | 0.52  | 0.26  | 0.17  | 0.06  | 0.55 | 0.70 | -0.03 | 0.38 | 0.47 | 0.40 | 1.00 |

## References

- Ang, S., Slaughter, S. A., and Ng, K. Y. 2002. "Human Capital and Institutional Determinants of Information Technology Compensation: Modeling Multilevel and Cross-Level Interactions," *Management Science* (48:11), pp. 1427-1445.
- Bapna, R., Langer, N., Mehra, A., Gopal, R., and Gupta, A. 2013. "Human Capital Investments and Employee Performance: An Analysis of IT Services Industry," *Management Science* (59:3), pp. 641-658.
- Carmel, E., and Agarwal, R. 2002. "The Maturation of Offshore Sourcing of Information Technology Work," *MIS Quarterly Executive* (1:2), pp. 65-77.
- Chari, M. D. R., Devaraj, S., and David, P. 2007. "International Diversification and Firm Performance: Role of Information Technology Investments," *Journal of World Business* (42), pp. 184-197.
- Dedrick, J., Gurbaxani, V., and Kraemer, K. L. 2003. "Information Technology and Economic Performance: A Critical Review of Empirical Evidence," *ACM Computing Surveys* (35:1), pp. 1-28.
- Espinosa, J. A., Slaughter, S. A., Kraut, R. E., and Herbsleb, J. D. 2007. "Familiarity, Complexity, and Team Performance in Geographically Distributed Software Development," *Organization Science* (18:4), pp. 613-630.
- Ho, V., Whitaker, J. W., Mithas, S., and Roy, P. K. 2013. "Success is More Than a Resumé: The Role of Social and Psychological Capital in Compensation for Offshore BPO Professionals," *Proceedings of the ACM SIGMIS CPR 2013 (May 30-June 1)*, K.D. Joshi and A. Morgan (eds.), Cincinnati, Ohio: Association for Computing Machinery, pp. 125-133.
- Ives, B., and Jarvenpaa, S. L. 1991. "Applications of Global Information Technology: Key Issues for Management," *MIS Quarterly* (15:1), pp. 33-49.
- Ives, B., Jarvenpaa, S. L., and Mason, R. O. 1993. "Global Business Drivers: Aligning Information Technology to Global Business Strategy," *IBM Systems Journal* (32:1), pp. 143-161.
- Jarvenpaa, S. L., and Ives, B. 1993. "Organizing for Global Competition: The Fit of Information Technology," *Decision Sciences* (24:3), pp. 547-580.
- Kettinger, W. J., Marchand, D. A., and Davis, J. M. 2010. "Designing Enterprise IT Architectures to Optimize Flexibility and Standardization in Global Business," *MIS Quarterly Executive* (9:2), pp. 95-113.
- Kim, K., Mithas, S., Whitaker, J., and Roy, P. K. 2014. "Industry-Specific Human Capital and Wages: Evidence from the Business Process Outsourcing Industry," *Information Systems Research* (25:3), pp. 618-638.
- King, W. R., and Sethi, V. 1999. "An Empirical Assessment of the Organization of Transnational Information Systems," *Journal of Management Information Systems* (15:4), pp. 7-28.
- Kraemer, K. L., Dedrick, J., Melville, N., and Zhu, K. 2006. *Global E-commerce: Impacts of National Environment and Policy*. Cambridge, UK: Cambridge University Press.
- Lacity, M. C., Feeny, D. F., and Willcocks, L. P. 2003. "Transforming a Back-Office Function: Lessons from BAE Systems' Experience with an Enterprise Partnership," *MIS Quarterly Executive* (2:2), pp. 86-103.

- Levina, N., and Xin, M. 2007. "Comparing IT Workers' Compensation Across Country Contexts: Demographic, Human Capital, and Institutional Factors," *Information System Research* (18:2), pp. 193-210.
- Mithas, S., and Lucas, H. C. 2010. "Are Foreign IT Workers Cheaper? U.S. Visa Policies and Compensation of Information Technology Professionals," *Management Science* (56:5), pp. 745-765.
- Mithas, S., and Whitaker, J. 2007. "Is the World Flat or Spiky? Information Intensity, Skills and Global Service Disaggregation," *Information Systems Research* (18:3), pp. 237-259.
- Nachum, L., and Zaheer, S. 2005. "The Persistence of Distance? The Impact of Technology on MNE Motivations for Foreign Investment," *Strategic Management Journal* (26:8), pp. 747-767.
- Rangan, S., and Sengul, M. 2009. "Information Technology and Transnational Integration: Theory and Evidence on the Evolution of the Modern Multinational Enterprise," *Journal of International Business Studies* (40), pp. 1496-1514.
- Rao, M. T., Brown, C. V., and Perkins, W. V. 2007. "Host Country Resource Availability and Information System Control Mechanisms in Multinational Corporations: An Empirical Test of Resource Dependence Theory," *Journal of Management Information Systems* (23:4), pp. 11-28.
- Ravichandran, T., Liu, Y., Han, S., and Hasan, I. 2009. "Diversification and Firm Performance: Exploring the Moderating Effects of Information Technology Spending," *Journal of Management Information Systems* (25:4), pp. 205-240.
- Rottman, J. W., and Lacity, M. C. 2004. "Twenty Practices for Offshore Sourcing," *MIS Quarterly Executive* (3:3), pp. 117-130.
- Sabherwal, R., and Jeyaraj, A. 2015. "Information Technology Impacts on Firm Performance: An Extension of Kohli and Devaraj (2003)," *MIS Quarterly* (39:4), pp. 809-836.
- Schryen, G. 2013. "Revisiting IS Business Value Research: What We Already Know, What We Still Need to Know, and How We Can Get There," *European Journal of Information Systems* (22:2), pp. 139-169.
- Sia, S. K., Soh, C., and Weill, P. 2010. "Global IT Management: Structuring for Scale, Responsiveness, and Innovation," *Communications of the ACM* (53:3), pp. 59-64.
- Su, N. 2013. "Internationalization strategies of Chinese IT service suppliers," *MIS Quarterly* (37:1), pp. 175-200.
- Whitaker, J., Mithas, S., and Krishnan, M. S. 2011. "Organizational Learning and Capabilities for Onshore and Offshore Business Process Outsourcing," *Journal of Management Information Systems* (27:3), pp. 11-42.
- Whitaker, J., Mithas, S., and Liu, C.-W. 2016. "Beauty is in the Eye of the Beholder: Toward a Contextual Understanding of Compensation for IT Professionals Within and Across Geographies," in: *Working Paper, University of Maryland, Robert H. Smith School of Business College Park*.
- Zhu, K., Kraemer, K. L., and Xu, S. X. 2006. "The Process of Innovation Assimilation by Firms in Different Countries: A Technology Diffusion Perspective on E-Business," *Management Science* (52:10), pp. 1557-1576.
